# Supplementary material for: No associations of a set of SNPs in the Vascular Endothelial Growth Factor (VEGF) and Matrix Metalloproteinase (MMP) genes with survival of colorectal cancer patients
Source: PubMed Central journal article supplement (PMC5055182; doi:10.1002/cam4.796), 2016-06-23
Supplement: CAM4-5-2221-s001.pdf [file CAM4-5-2221-s001.pdf]

**Figure 1:** Kaplan-Meier survival plots for the four polymorphisms with  $p < 0.05$  in both the discovery (A) and replication (B) cohorts

**A) Discovery cohort (overall survival)**

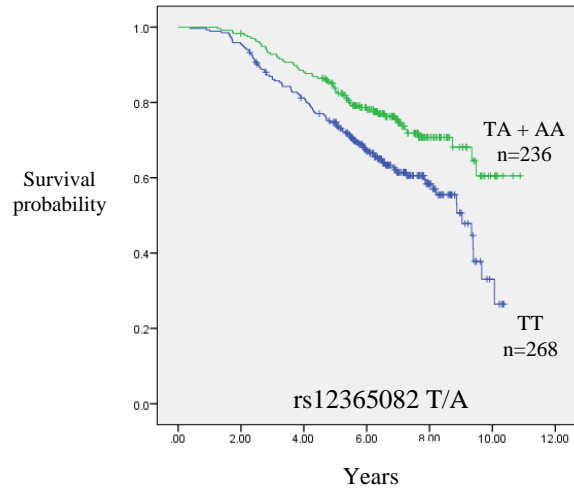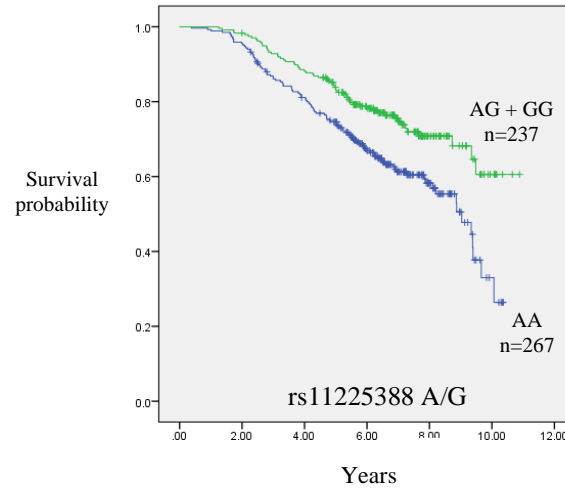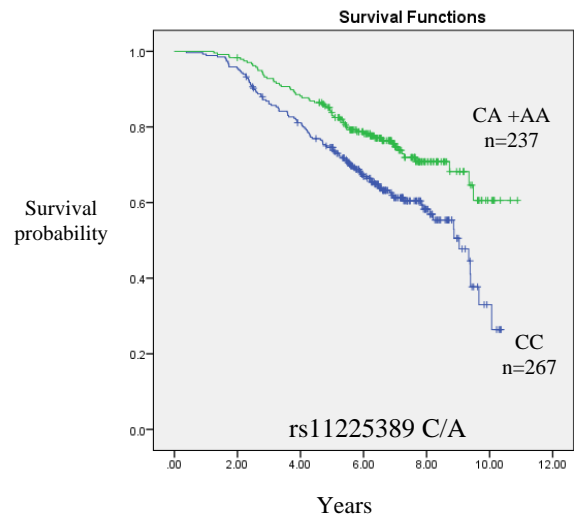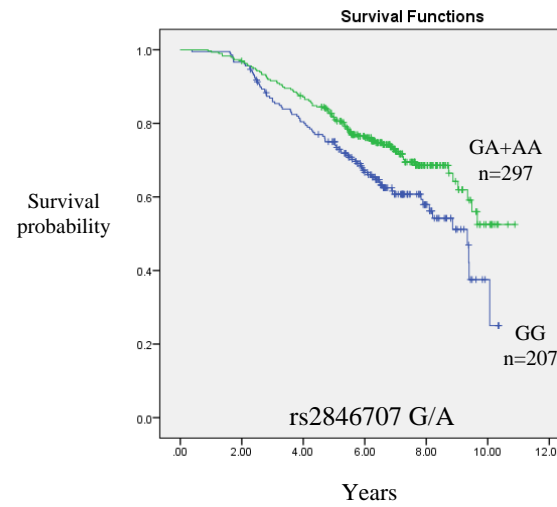

**B) Replication cohort (overall survival)**

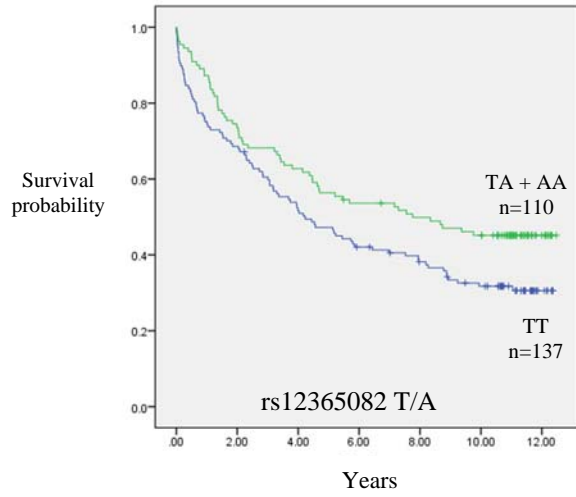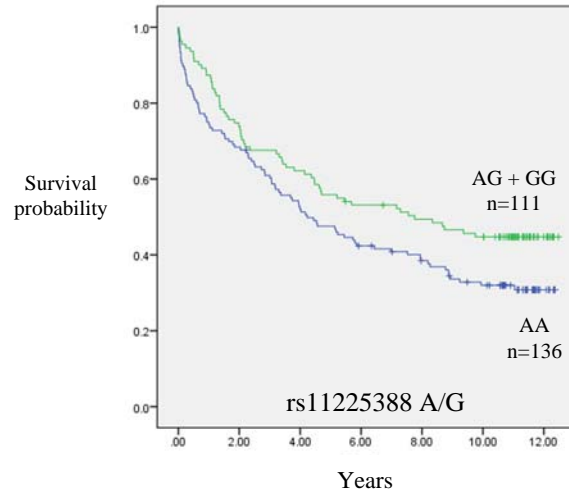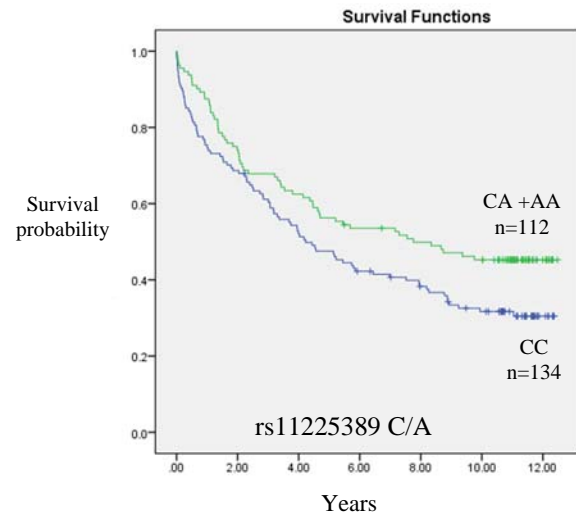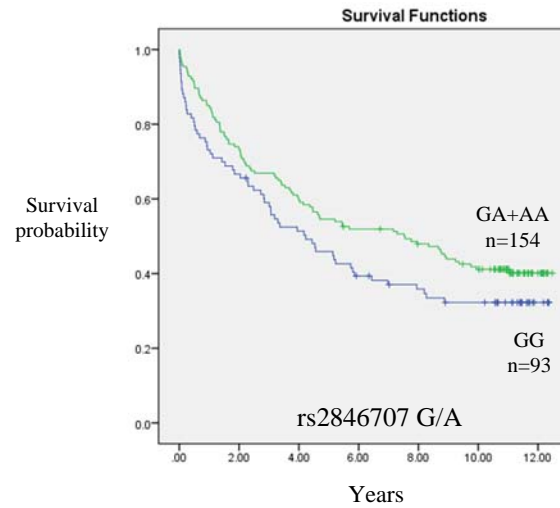

Kaplan Meier curves for the four highly linked polymorphisms that had the lowest univariate analysis p-values in both the discovery and the replication cohorts.
