# Supplementary material for: No associations of a set of SNPs in the Vascular Endothelial Growth Factor (VEGF) and Matrix Metalloproteinase (MMP) genes with survival of colorectal cancer patients
Source: PubMed Central journal article supplement (PMC5055182; doi:10.1002/cam4.796), 2016-06-23
Supplement: CAM4-5-2221-s002.pdf [file CAM4-5-2221-s002.pdf]

**Supplementary Figure 2.** The MMP gene cluster on chromosome 11q22

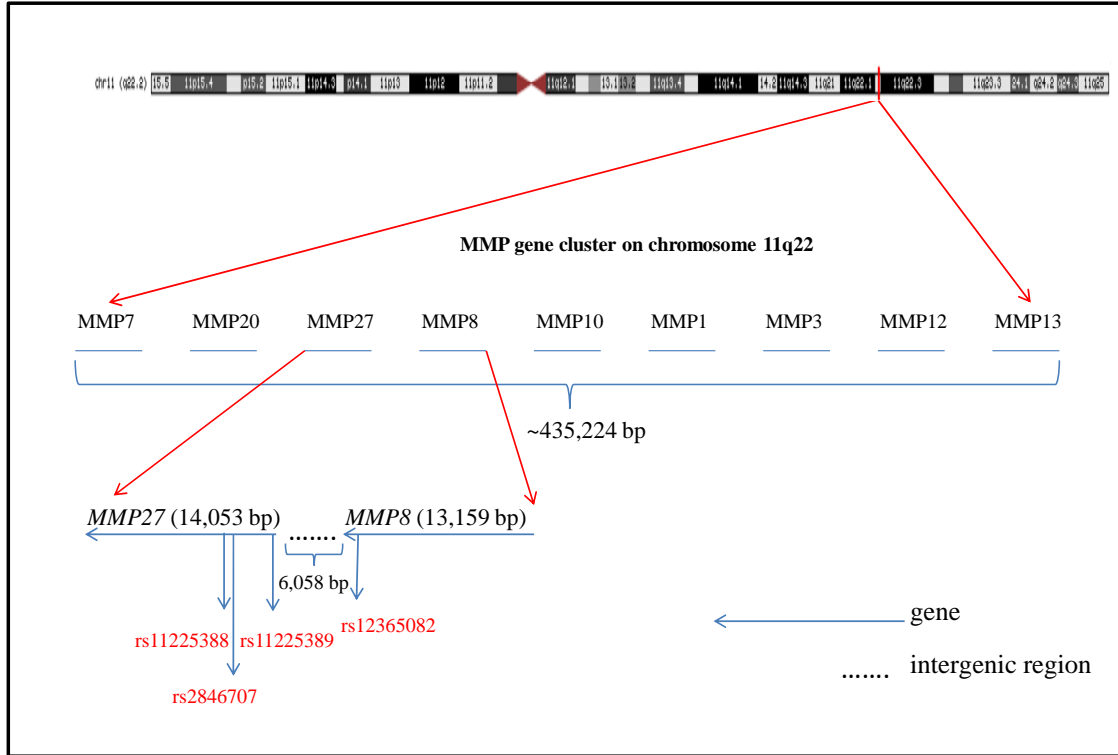

The MMP gene cluster on chromosome 11q22 encompasses ~ 435 kilobases long region and contains nine MMP genes. *MMP27* and *MMP8* genes are 14,053 and 13,159 base pairs long, respectively. The distance between the *MMP27*\_rs11225388 and *MMP27*\_rs2846707, *MMP27*\_rs11225389, and *MMP8*\_rs12365082 polymorphisms are 110, 729 and 7,093 base pairs, respectively. Chromosomal bar is obtained from the UCSC genome browser website (25). Figure not drawn to scale.
