# Supplementary material for: No associations of a set of SNPs in the Vascular Endothelial Growth Factor (VEGF) and Matrix Metalloproteinase (MMP) genes with survival of colorectal cancer patients
Source: PubMed Central journal article supplement (PMC5055182; doi:10.1002/cam4.796), 2016-06-23
Supplement: CAM4-5-2221-s003.pdf [file CAM4-5-2221-s003.pdf]

## Supplementary Information

**Supplementary Table 1.** Genes and the number of SNPs from each gene investigated during this study.

| <b>Gene</b>   | <b>Number of SNPs</b> |
|---------------|-----------------------|
| <i>VEGFA</i>  | 11                    |
| <i>VEGFB</i>  | 2                     |
| <i>VEGFC</i>  | 19                    |
| <i>VEGFD</i>  | 7                     |
| <i>PGF</i>    | 2                     |
| <i>VEGFR1</i> | 49                    |
| <i>VEGFR2</i> | 19                    |
| <i>VEGFR3</i> | 20                    |
| <i>MMP1</i>   | 10                    |
| <i>MMP2</i>   | 22                    |
| <i>MMP3</i>   | 4                     |
| <i>MMP7</i>   | 5                     |
| <i>MMP8</i>   | 9                     |
| <i>MMP9</i>   | 6                     |
| <i>MMP10</i>  | 11                    |
| <i>MMP11</i>  | 3                     |

|                   |                    |
|-------------------|--------------------|
| <i>MMP12</i>      | 3                  |
| <i>MMP13</i>      | 4                  |
| <i>MMP14</i>      | 9                  |
| <i>MMP15</i>      | 4                  |
| <i>MMP16</i>      | 70                 |
| <i>MMP17</i>      | 13                 |
| <i>MMP19</i>      | 3                  |
| <i>MMP20</i>      | 21                 |
| <i>MMP21</i>      | 3                  |
| <i>MMP23B</i>     | 0                  |
| <i>MMP24</i>      | 25                 |
| <i>MMP25</i>      | 7                  |
| <i>MMP26</i>      | 1                  |
| <i>MMP27</i>      | 17                 |
| <i>MMP28</i>      | 2                  |
| <b>Total = 31</b> | <b>Total = 381</b> |
